# Supplementary material
Source: PubMed Central journal article supplement (PMC4018898)
Supplement: AEM.03414-13_zam999105336so2.pdf [file AEM.03414-13_zam999105336so2.pdf]

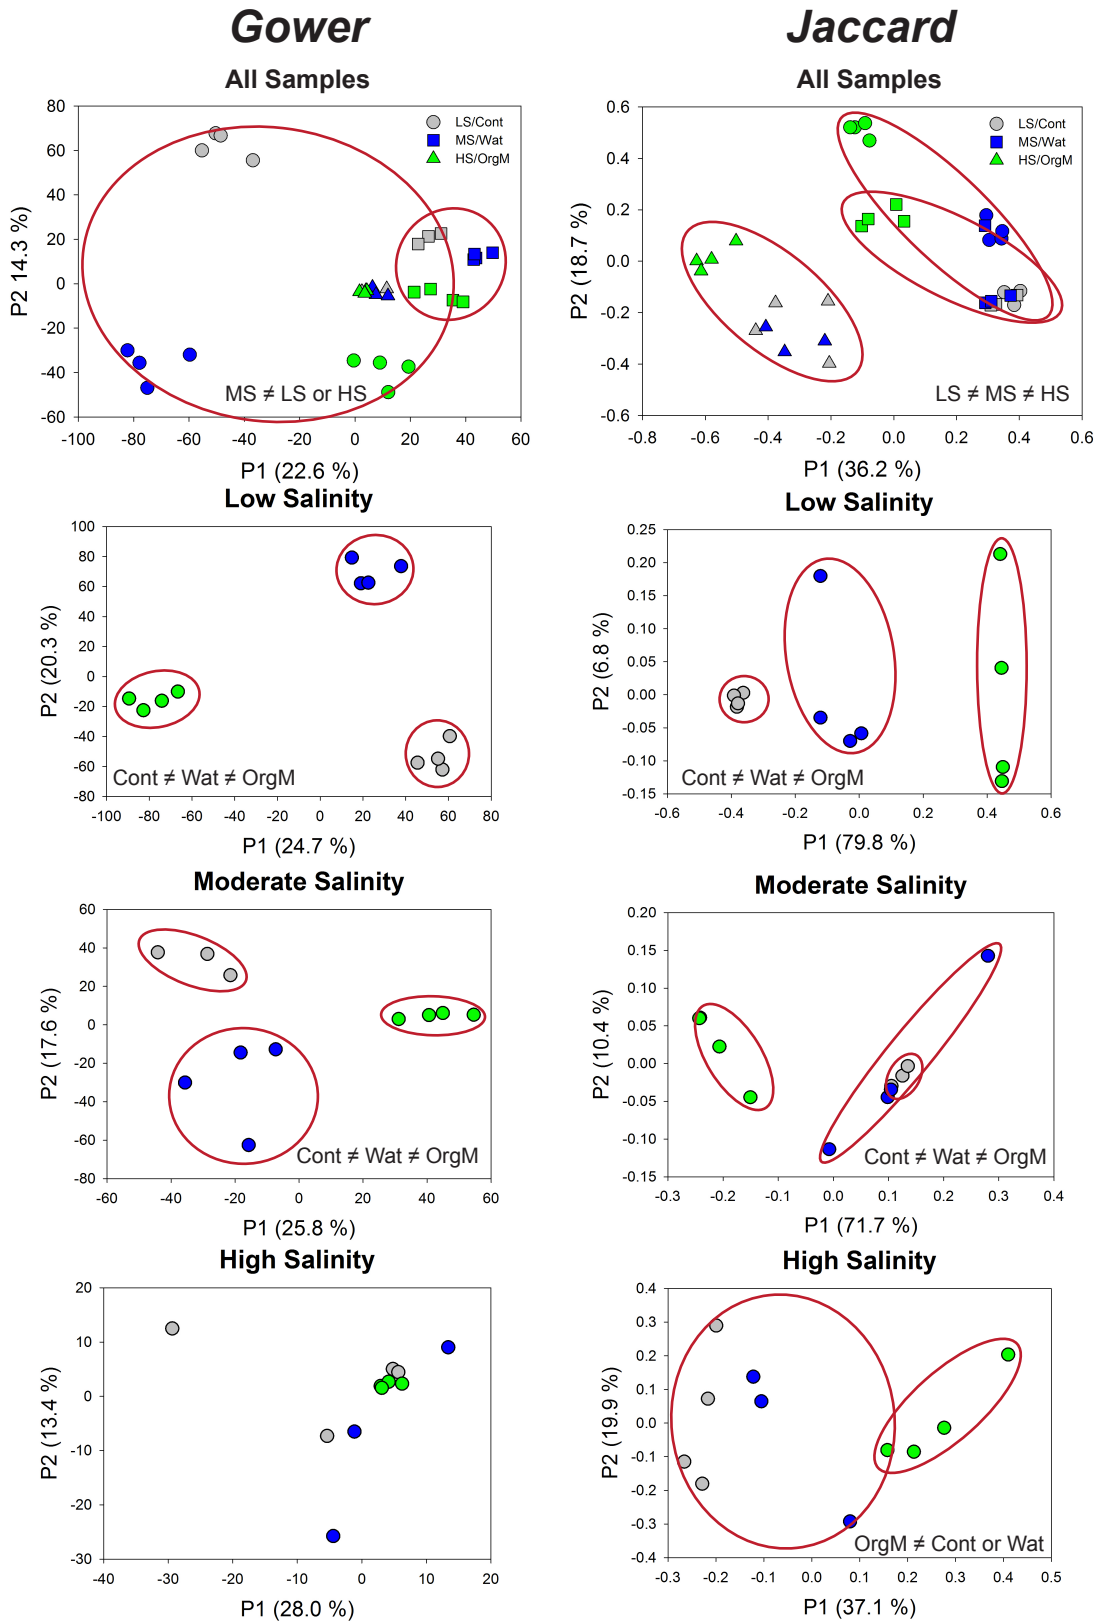

Figure S2: Principal coordinate analyses of the Gower and Jaccard distance matrices created from the OTU table (97% identity) for all combined samples and for each site individually. Control (Cont), water (Wat), and organic matter (OrgM) additions are represented by grey, blue, and green symbols, respectively, while low (LS), moderate (MS), and high (HS) salinity sites are represented by circles, squares, and triangles, respectively. Groupings of samples that are significantly different from other groups (ANOSIM,  $P < 0.05$  and  $R > 0.40$ ) are delineated with a red oval.
